# Supplementary figures and images for: The membrane regulator squalane increases membrane rigidity under high hydrostatic pressure in archaeal membrane mimics
Source: Royal Society of Chemistry journal article supplement (doi:10.1039/d3sm00352c), 2023-01-01

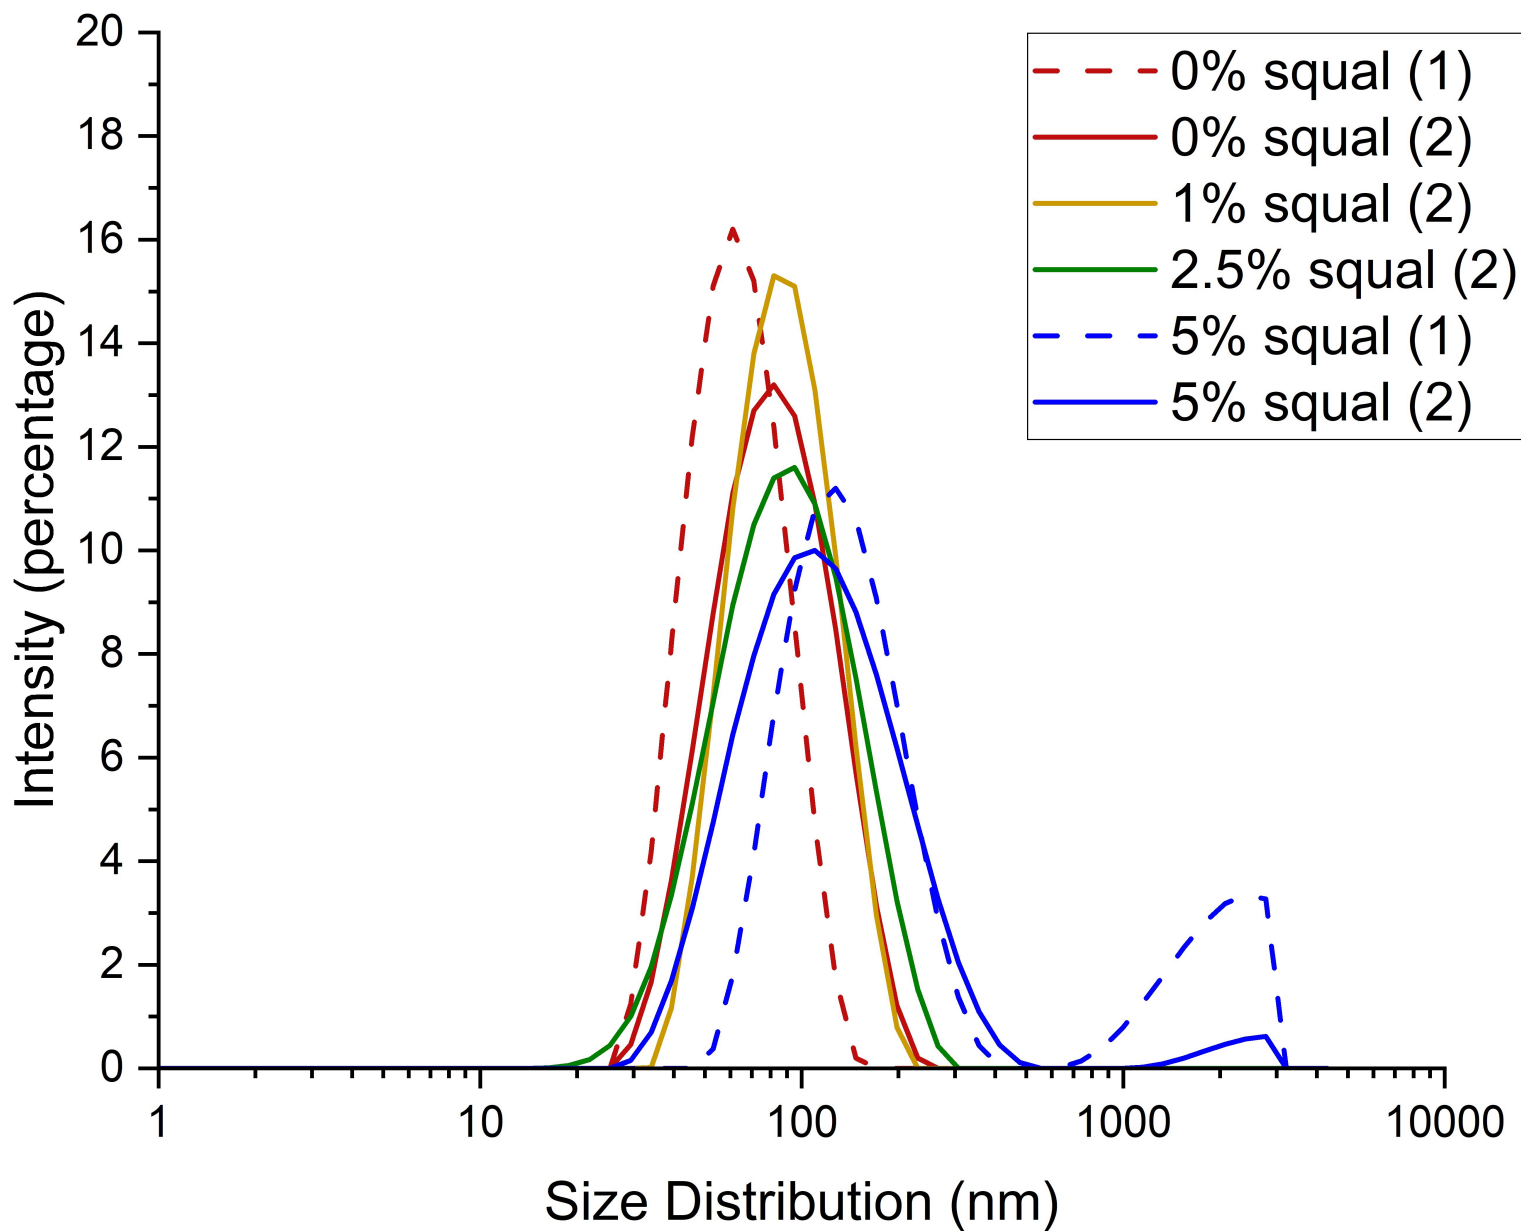

Supplement: d3sm00352c2.pdf [file d3sm00352c2.pdf]

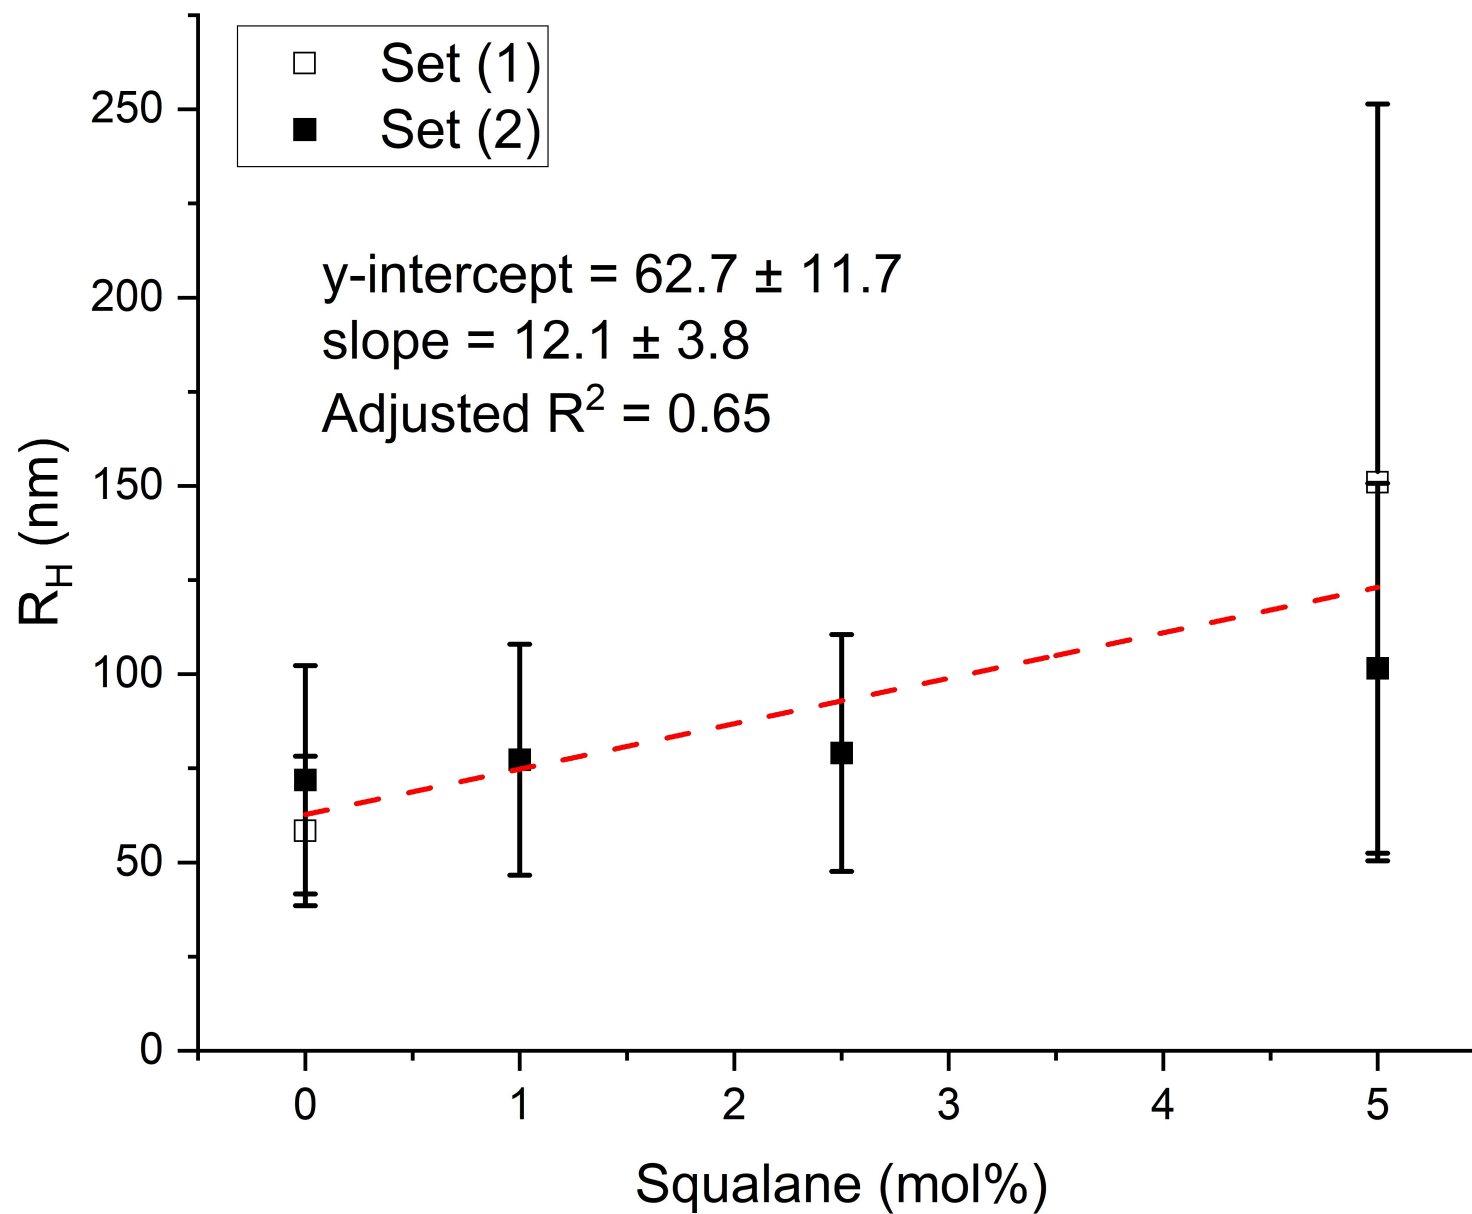

Supplement: d3sm00352c3.pdf [file d3sm00352c3.pdf]
